# Supplementary material for: Effects of Sediment Dredging on Nutrient Release and Eutrophication in the Gate-Controlled Estuary of Northern Taihu Lake
Source: Hindawi journal article supplement (doi:10.1155/2021/7451832), 2021-01-19
Supplement: f1 [file 7451832.f1.docx]

**Supporting information**

***Correspondence to:**

Yanhua Wang and Xi Chen

Institute: School of Geography, Nanjing Normal University

Address: 1 Wenyuan Road, Qixia, Nanjing 210023, PR China

Tel: +8625-8589-1665

E-mail: [wangyanhua@njnu.edu.cn](mailto:wangyanhua@njnu.edu.cn)

Number of Pages: 5

Number of Figures: 1

Number of Tables: 3

TABLE S1: Factor selection and experimental design.

|  | Temperature  (℃) | Stirring speeds  (r/min) | Depth  (cm) |
| --- | --- | --- | --- |
| 1 | 20 | 0 | 0-15 |
| 2 | 20 | 90 | 0-15 |
| 3 | 20 | 120 | 0-15 |
| 4 | 30 | 0 | 0-15 |
| 5 | 30 | 90 | 0-15 |
| 6 | 30 | 120 | 0-15 |
| 7 | 30 | 120 | 16-30 |
| 8 | 30 | 120 | 31-45 |

TABLE S2: Two-way repeated measures ANOVA of nutrients release responding to disturbance and temperature variation.

Note: V1 to V3 are the stirring speeds of 0, 90, and 120 r/min, respectively; T1 and T2 are the temperatures of 20 and 30°C, respectively; a and b represent the values of F-test and significance level; * represents the significance at 0.05; ** represents the significance at 0.01

|  | V1T2 | V2T2 | D3T2 | D3T1 | D3T2 |
| --- | --- | --- | --- | --- | --- |
| V1T1 | 6.39 a/0.02* b |  |  |  |  |
| D2T1 |  | 2.67/0.123 |  |  |  |
| D3T1 |  |  | 2.93/0.108 |  |  |
| V1T1/V2T1 |  |  |  | 124.24/0.00** |  |
| V1T2/V2T2 |  |  |  |  | 142.49/0.00** |

**T**ABLE S3: The classifications of water quality based on the Nemerow pollution index (CNPI)

| CNPI | Classification |
| --- | --- |
| CNPI ≤ 0.63 | Safe |
| 0.63 < CNPI ≤ 0.74 | Warning |
| 0.74 < CNPI ≤ 1 | Slight pollution |
| 1 < CNPI ≤ 7.28 | Moderate pollution |
| 7.28 < CNPI < 11.09 | Heavy pollution |


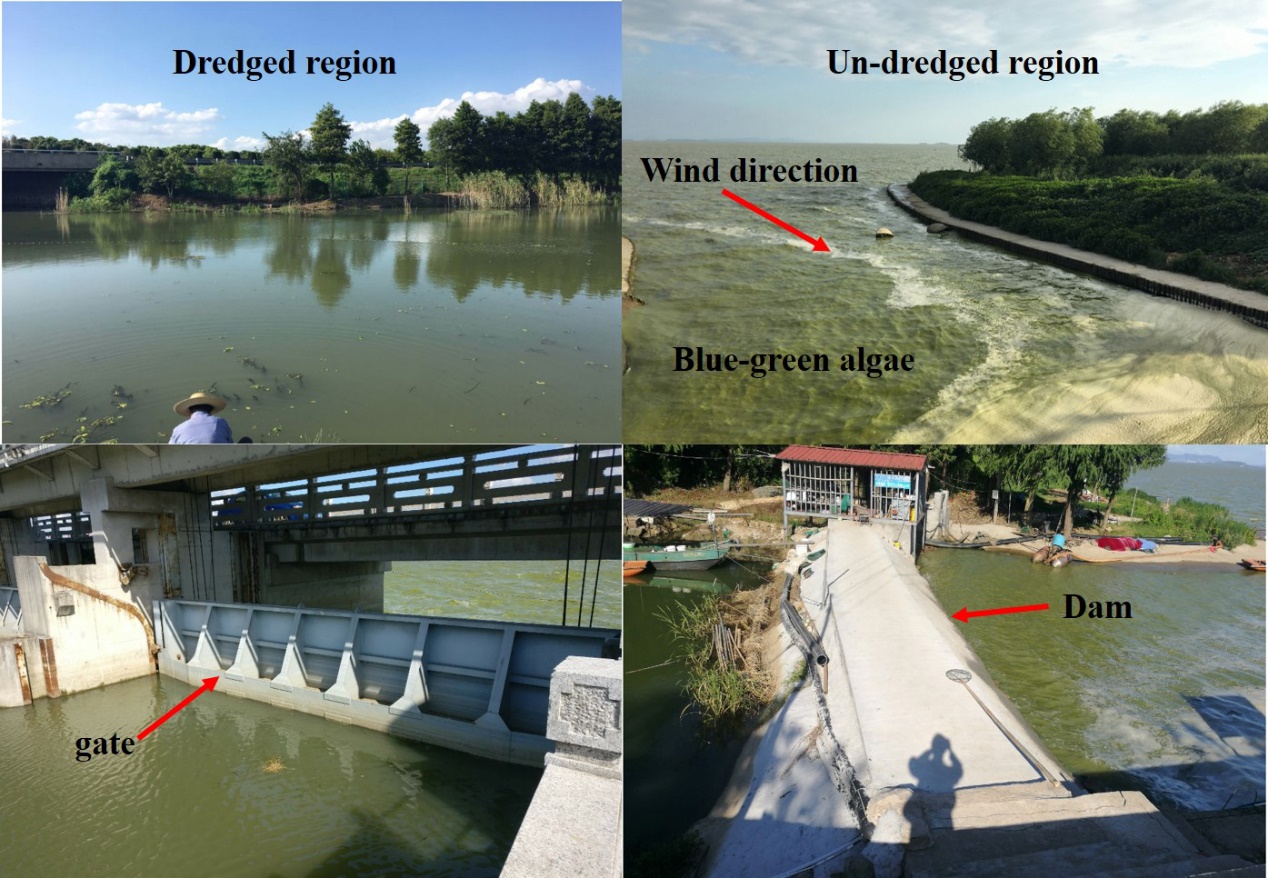


FIGURE S1: Field investigation of dredged and un-dredged region, and different types of dams and gates.
